# Supplementary material for: Estimating genomic coexpression networks using first-order conditional independence
Source: PubMed Central journal article supplement (PMC545795; doi:10.1186/gb-2004-5-12-r100), 2004-11-30
Supplement: gb-2004-5-12-r100-s2.pdf [file gb-2004-5-12-r100-s2.pdf]

### Locally Distinct Subgraphs

Each group listed below represents one of the locally distinct subgraphs extracted from the giant connected component of the yeast co-expression network using the graph search algorithm described in the text.

Note: the annotation used here corresponds to the Yeast GO Slim biological process annotation from SGD.

| ORF            | Gene Name | GO Slim                 |
|----------------|-----------|-------------------------|
| <b>Group A</b> |           |                         |
| YAL038W        | CDC19     | carbohydrate metabolism |
| YDR418W        | RPL12B    | protein biosynthesis    |
| YLR029C        | RPL15A    | protein biosynthesis    |
| YPL220W        | RPL1A     | protein biosynthesis    |
| YBR191W        | RPL21A    | protein biosynthesis    |
| YLR061W        | RPL22A    | protein biosynthesis    |
| YGL031C        | RPL24A    | protein biosynthesis    |
| YGR148C        | RPL24B    | protein biosynthesis    |
| YOL127W        | RPL25     | protein biosynthesis    |
| YLR344W        | RPL26A    | protein biosynthesis    |
| YHR010W        | RPL27A    | protein biosynthesis    |
| YGL103W        | RPL28     | protein biosynthesis    |
| YBR031W        | RPL4A     | protein biosynthesis    |
| YDR012W        | RPL4B     | protein biosynthesis    |
| YLR340W        | RPP0      | protein biosynthesis    |
| YDL081C        | RPP1A     | protein biosynthesis    |
| YDL130W        | RPP1B     | protein biosynthesis    |
| YDR382W        | RPP2B     | protein biosynthesis    |
| YCR031C        | RPS14A    | protein biosynthesis    |
| YOL040C        | RPS15     | protein biosynthesis    |
| YDL083C        | RPS16B    | protein biosynthesis    |
| YDR450W        | RPS18A    | protein biosynthesis    |
| YLR441C        | RPS1A     | protein biosynthesis    |
| YJL190C        | RPS22A    | protein biosynthesis    |
| YGL189C        | RPS26A    | protein biosynthesis    |
| YER131W        | RPS26B    | protein biosynthesis    |
| YOR167C        | RPS28A    | protein biosynthesis    |
| YDL061C        | RPS29B    | protein biosynthesis    |
| YOR182C        | RPS30B    | protein biosynthesis    |
| YLR167W        | RPS31     | protein biosynthesis    |
| YJR145C        | RPS4A     | protein biosynthesis    |
| YBR189W        | RPS9B     | protein biosynthesis    |
| YBR118W        | TEF2      | protein biosynthesis    |

Known: 33, Unknown: 0, Not in annotation: 0

|                |       |                                                         |
|----------------|-------|---------------------------------------------------------|
| <b>Group B</b> |       |                                                         |
| YOL139C        | CDC33 | cell cycle                                              |
| YLR150W        | STM1  | nuclear organization and biogenesis, response to stress |
| YPL037C        | EGD1  | protein biosynthesis                                    |

|           |        |                      |
|-----------|--------|----------------------|
| YLR075W   | RPL10  | protein biosynthesis |
| YPR102C   | RPL11A | protein biosynthesis |
| YGR085C   | RPL11B | protein biosynthesis |
| YEL054C   | RPL12A | protein biosynthesis |
| YDL082W   | RPL13A | protein biosynthesis |
| YKL006W   | RPL14A | protein biosynthesis |
| YIL133C   | RPL16A | protein biosynthesis |
| YNL069C   | RPL16B | protein biosynthesis |
| YJL177W   | RPL17B | protein biosynthesis |
| YOL120C   | RPL18A | protein biosynthesis |
| YNL301C   | RPL18B | protein biosynthesis |
| YBR084C-A | RPL19A | protein biosynthesis |
| YBL027W   | RPL19B | protein biosynthesis |
| YGL135W   | RPL1B  | protein biosynthesis |
| YPL079W   | RPL21B | protein biosynthesis |
| YER117W   | RPL23B | protein biosynthesis |
| YGR034W   | RPL26B | protein biosynthesis |
| YDR471W   | RPL27B | protein biosynthesis |
| YIL018W   | RPL2B  | protein biosynthesis |
| YOR063W   | RPL3   | protein biosynthesis |
| YGL030W   | RPL30  | protein biosynthesis |
| YOR234C   | RPL33B | protein biosynthesis |
| YIL052C   | RPL34B | protein biosynthesis |
| YLR185W   | RPL37A | protein biosynthesis |
| YDR500C   | RPL37B | protein biosynthesis |
| YLR325C   | RPL38  | protein biosynthesis |
| YJL189W   | RPL39  | protein biosynthesis |
| YKR094C   | RPL40B | protein biosynthesis |
| YHR141C   | RPL42B | protein biosynthesis |
| YPR043W   | RPL43A | protein biosynthesis |
| YPL131W   | RPL5   | protein biosynthesis |
| YLR448W   | RPL6B  | protein biosynthesis |
| YGL076C   | RPL7A  | protein biosynthesis |
| YPL198W   | RPL7B  | protein biosynthesis |
| YLL045C   | RPL8B  | protein biosynthesis |
| YGL147C   | RPL9A  | protein biosynthesis |
| YOL039W   | RPP2A  | protein biosynthesis |
| YGR214W   | RPS0A  | protein biosynthesis |
| YDR064W   | RPS13  | protein biosynthesis |
| YJL191W   | RPS14B | protein biosynthesis |
| YDR447C   | RPS17B | protein biosynthesis |
| YOL121C   | RPS19A | protein biosynthesis |
| YNL302C   | RPS19B | protein biosynthesis |
| YML063W   | RPS1B  | protein biosynthesis |
| YGL123W   | RPS2   | protein biosynthesis |
| YHL015W   | RPS20  | protein biosynthesis |
| YKR057W   | RPS21A | protein biosynthesis |
| YJL136C   | RPS21B | protein biosynthesis |
| YLR367W   | RPS22B | protein biosynthesis |
| YGR118W   | RPS23A | protein biosynthesis |
| YPR132W   | RPS23B | protein biosynthesis |
| YER074W   | RPS24A | protein biosynthesis |

|         |         |                            |
|---------|---------|----------------------------|
| YIL069C | RPS24B  | protein biosynthesis       |
| YGR027C | RPS25A  | protein biosynthesis       |
| YLR264W | RPS28B  | protein biosynthesis       |
| YLR388W | RPS29A  | protein biosynthesis       |
| YNL178W | RPS3    | protein biosynthesis       |
| YHR203C | RPS4B   | protein biosynthesis       |
| YBR181C | RPS6B   | protein biosynthesis       |
| YPL081W | RPS9A   | protein biosynthesis       |
| YKR059W | TIF1    | protein biosynthesis       |
| YJL138C | TIF2    | protein biosynthesis       |
| YML106W | URA5    | Not in annotation          |
| YKL056C | YKL056C | biological_process unknown |

Known: 65, Unknown: 1, Not in annotation: 1

### Group C

|         |         |                                                  |
|---------|---------|--------------------------------------------------|
| YLR175W | CBF5    | RNA metabolism                                   |
| YNL112W | DBP2    | RNA metabolism                                   |
| YPL266W | DIM1    | RNA metabolism                                   |
| YJL125C | GCD14   | RNA metabolism                                   |
| YNL075W | IMP4    | RNA metabolism                                   |
| YDL051W | LHP1    | RNA metabolism                                   |
| YJR002W | MPP10   | RNA metabolism                                   |
| YGL120C | PRP43   | RNA metabolism                                   |
| YGR280C | PXR1    | RNA metabolism                                   |
| YLR197W | SIK1    | RNA metabolism                                   |
| YGR195W | SKI6    | RNA metabolism                                   |
| YLL011W | SOF1    | RNA metabolism                                   |
| YKR056W | TRM2    | RNA metabolism                                   |
| YDR165W | TRM82   | RNA metabolism                                   |
| YLR401C | YLR401C | RNA metabolism                                   |
| YGL078C | DBP3    | RNA metabolism, ribosome biogenesis and assembly |
| YNR038W | DBP6    | RNA metabolism, ribosome biogenesis and assembly |
| YKR024C | DBP7    | RNA metabolism, ribosome biogenesis and assembly |
| YLR276C | DBP9    | RNA metabolism, ribosome biogenesis and assembly |
| YLR129W | DIP2    | RNA metabolism, ribosome biogenesis and assembly |
| YLL008W | DRS1    | RNA metabolism, ribosome biogenesis and assembly |
| YKL172W | EBP2    | RNA metabolism, ribosome biogenesis and assembly |
| YBR247C | ENP1    | RNA metabolism, ribosome biogenesis and assembly |
| YMR049C | ERB1    | RNA metabolism, ribosome biogenesis and assembly |
| YJL033W | HCA4    | RNA metabolism, ribosome biogenesis and assembly |
| YPR112C | MRD1    | RNA metabolism, ribosome biogenesis and assembly |
| YKL009W | MRT4    | RNA metabolism, ribosome biogenesis and assembly |
| YPL211W | NIP7    | RNA metabolism, ribosome biogenesis and assembly |
| YNL061W | NOP2    | RNA metabolism, ribosome biogenesis and assembly |
| YGR159C | NSR1    | RNA metabolism, ribosome biogenesis and assembly |
| YER006W | NUG1    | RNA metabolism, ribosome biogenesis and assembly |
| YOR145C | PNO1    | RNA metabolism, ribosome biogenesis and assembly |
| YGL171W | ROK1    | RNA metabolism, ribosome biogenesis and assembly |
| YHR088W | RPF1    | RNA metabolism, ribosome biogenesis and assembly |

|         |         |                                                      |
|---------|---------|------------------------------------------------------|
| YKR081C | RPF2    | RNA metabolism, ribosome biogenesis and assembly     |
| YDR087C | RRP1    | RNA metabolism, ribosome biogenesis and assembly     |
| YDR083W | RRP8    | RNA metabolism, ribosome biogenesis and assembly     |
| YFL002C | SPB4    | RNA metabolism, ribosome biogenesis and assembly     |
| YLR435W | TSR2    | RNA metabolism, ribosome biogenesis and assembly     |
| YJL109C | UTP10   | RNA metabolism, ribosome biogenesis and assembly     |
| YKL099C | UTP11   | RNA metabolism, ribosome biogenesis and assembly     |
| YLR222C | UTP13   | RNA metabolism, ribosome biogenesis and assembly     |
| YML093W | UTP14   | RNA metabolism, ribosome biogenesis and assembly     |
| YMR093W | UTP15   | RNA metabolism, ribosome biogenesis and assembly     |
| YJL069C | UTP18   | RNA metabolism, ribosome biogenesis and assembly     |
| YDR324C | UTP4    | RNA metabolism, ribosome biogenesis and assembly     |
| YDR398W | UTP5    | RNA metabolism, ribosome biogenesis and assembly     |
| YDR449C | UTP6    | RNA metabolism, ribosome biogenesis and assembly     |
| YGR128C | UTP8    | RNA metabolism, ribosome biogenesis and assembly     |
| YHR196W | UTP9    | RNA metabolism, ribosome biogenesis and assembly     |
| YDR365C | YDR365C | RNA metabolism, ribosome biogenesis and assembly     |
| YDR412W | YDR412W | RNA metabolism, ribosome biogenesis and assembly     |
| YGR145W | YGR145W | RNA metabolism, ribosome biogenesis and assembly     |
| YGR272C | YGR272C | RNA metabolism, ribosome biogenesis and assembly     |
| YJL010C | YJL010C | RNA metabolism, ribosome biogenesis and assembly     |
| YGR245C | SDA1    | cell cycle, cytoskeleton organization and biogenesis |
| YNL256W | FOL1    | coenzyme and prosthetic group metabolism             |
| YGL099W | LSG1    | conjugation                                          |
| YDR312W | SSF2    | conjugation                                          |
| YLR074C | BUD20   | cytokinesis                                          |
| YMR014W | BUD22   | cytokinesis                                          |
| YKL082C | YKL082C | cytoskeleton organization and biogenesis             |
| YBL039C | URA7    | lipid metabolism                                     |
| YIR026C | YVH1    | meiosis                                              |
| YNL062C | GCD10   | protein biosynthesis                                 |
| YMR309C | NIP1    | protein biosynthesis                                 |
| YHR052W | CIC1    | protein catabolism                                   |
| YGR123C | PPT1    | protein modification                                 |
| YDR465C | RMT2    | protein modification                                 |
| YDR101C | ARX1    | ribosome biogenesis and assembly                     |
| YOL077C | BRX1    | ribosome biogenesis and assembly                     |
| YGL029W | CGR1    | ribosome biogenesis and assembly                     |
| YKL078W | DHR2    | ribosome biogenesis and assembly                     |
| YMR128W | ECM16   | ribosome biogenesis and assembly                     |
| YLR186W | EMG1    | ribosome biogenesis and assembly                     |
| YCL059C | KRR1    | ribosome biogenesis and assembly                     |
| YAL025C | MAK16   | ribosome biogenesis and assembly                     |
| YHR170W | NMD3    | ribosome biogenesis and assembly                     |
| YOR206W | NOC2    | ribosome biogenesis and assembly                     |
| YPR144C | NOC4    | ribosome biogenesis and assembly                     |
| YPL093W | NOG1    | ribosome biogenesis and assembly                     |
| YNR053C | NOG2    | ribosome biogenesis and assembly                     |
| YNL110C | NOP15   | ribosome biogenesis and assembly                     |
| YER002W | NOP16   | ribosome biogenesis and assembly                     |
| YGR103W | NOP7    | ribosome biogenesis and assembly                     |
| YGL111W | NSA1    | ribosome biogenesis and assembly                     |

|         |       |                                  |
|---------|-------|----------------------------------|
| YER126C | NSA2  | ribosome biogenesis and assembly |
| YOL080C | REX4  | ribosome biogenesis and assembly |
| YLR009W | RLP24 | ribosome biogenesis and assembly |
| YMR131C | RRB1  | ribosome biogenesis and assembly |
| YCL054W | SPB1  | ribosome biogenesis and assembly |
| YIR012W | SQT1  | ribosome biogenesis and assembly |
| YDL060W | TSR1  | ribosome biogenesis and assembly |
| YJL148W | RPA34 | transcription                    |
| YNL248C | RPA49 | transcription                    |
| YNL113W | RPC19 | transcription                    |
| YKR025W | RPC37 | transcription                    |
| YPR110C | RPC40 | transcription                    |

|         |         |                            |
|---------|---------|----------------------------|
| YMR269W | YMR269W | Not in annotation          |
| YDR361C | BCP1    | biological_process unknown |
| YLR449W | FPR4    | biological_process unknown |
| YAL036C | FUN11   | biological_process unknown |
| YMR290C | HAS1    | biological_process unknown |
| YGR187C | HGH1    | biological_process unknown |
| YNL132W | KRE33   | biological_process unknown |
| YPL226W | NEW1    | biological_process unknown |
| YNL175C | NOP13   | biological_process unknown |
| YDR496C | PUF6    | biological_process unknown |
| YLR196W | PWP1    | biological_process unknown |
| YBL028C | YBL028C | biological_process unknown |
| YCR016W | YCR016W | biological_process unknown |
| YCR072C | YCR072C | biological_process unknown |
| YDL063C | YDL063C | biological_process unknown |
| YER036C | YER036C | biological_process unknown |
| YIL019W | YIL019W | biological_process unknown |
| YIL127C | YIL127C | biological_process unknown |
| YJL122W | YJL122W | biological_process unknown |
| YLR051C | YLR051C | biological_process unknown |
| YLR221C | YLR221C | biological_process unknown |
| YNR054C | YNR054C | biological_process unknown |
| YOL022C | YOL022C | biological_process unknown |
| YOL124C | YOL124C | biological_process unknown |
| YPL146C | YPL146C | biological_process unknown |
| YPR143W | YPR143W | biological_process unknown |

Known: 98, Unknown: 25, Not in annotation: 1

#### Group D

|         |      |                         |
|---------|------|-------------------------|
| YHR174W | ENO2 | carbohydrate metabolism |
| YKL060C | FBA1 | carbohydrate metabolism |
| YBR196C | PGI1 | carbohydrate metabolism |
| YCR012W | PGK1 | carbohydrate metabolism |
| YJL052W | TDH1 | carbohydrate metabolism |
| YJR009C | TDH2 | carbohydrate metabolism |
| YGR192C | TDH3 | carbohydrate metabolism |
| YDR050C | TPI1 | carbohydrate metabolism |

|         |      |                 |
|---------|------|-----------------|
| YLR044C | PDC1 | energy pathways |
| YLR134W | PDC5 | energy pathways |

Known: 10, Unknown: 0, Not in annotation: 0

### Group E

|         |       |                                          |
|---------|-------|------------------------------------------|
| YGR124W | ASN2  | amino acid and derivative metabolism     |
| YCR053W | THR4  | amino acid and derivative metabolism     |
| YLR354C | TAL1  | carbohydrate metabolism                  |
| YLR153C | ACS2  | coenzyme and prosthetic group metabolism |
| YGR204W | ADE3  | coenzyme and prosthetic group metabolism |
| YML126C | ERG13 | lipid metabolism                         |
| YML008C | ERG6  | lipid metabolism                         |
| YDR226W | ADK1  | Not in annotation                        |

Known: 7, Unknown: 0, Not in annotation: 1

### Group F

|         |       |                                                                   |
|---------|-------|-------------------------------------------------------------------|
| YMR302C | PRP12 | RNA metabolism, organelle organization and biogenesis, ribosome b |
| YKR048C | NAP1  | budding                                                           |
| YMR276W | DSK2  | cell cycle                                                        |
| YKL007W | CAP1  | cell wall organization and biogenesis                             |
| YMR267W | PPA2  | cellular respiration                                              |
| YLR330W | CHS5  | conjugation                                                       |
| YKL003C | MRP17 | protein biosynthesis                                              |
| YPR103W | PRE2  | protein catabolism                                                |
| YFR050C | PRE4  | protein catabolism                                                |
| YOL038W | PRE6  | protein catabolism                                                |
| YML092C | PRE8  | protein catabolism                                                |
| YGR135W | PRE9  | protein catabolism                                                |
| YOR157C | PUP1  | protein catabolism                                                |
| YHR200W | RPN10 | protein catabolism                                                |
| YFR004W | RPN11 | protein catabolism                                                |
| YFR052W | RPN12 | protein catabolism                                                |
| YER021W | RPN3  | protein catabolism                                                |
| YDL097C | RPN6  | protein catabolism                                                |
| YPR108W | RPN7  | protein catabolism                                                |
| YKL145W | RPT1  | protein catabolism                                                |
| YDR394W | RPT3  | protein catabolism                                                |
| YOR117W | RPT5  | protein catabolism                                                |
| YGL048C | RPT6  | protein catabolism                                                |
| YGL011C | SCL1  | protein catabolism                                                |
| YJR117W | STE24 | protein modification                                              |
| YER012W | PRE1  | response to stress                                                |
| YJL001W | PRE3  | response to stress                                                |
| YGR253C | PUP2  | response to stress                                                |
| YJL036W | SNX4  | transport                                                         |

|         |         |                            |
|---------|---------|----------------------------|
| YGR048W | UFD1    | transport                  |
| YGR167W | CLC1    | vesicle-mediated transport |
| YKL002W | DID4    | vesicle-mediated transport |
| YJL053W | PEP8    | vesicle-mediated transport |
| YOR132W | VPS17   | vesicle-mediated transport |
| YOR163W | DDP1    | Not in annotation          |
| YKL117W | SBA1    | Not in annotation          |
| YKL160W | YKL160W | Not in annotation          |
| YOR042W | CUE5    | biological_process unknown |
| YIR003W | YIR003W | biological_process unknown |
| YKR016W | YKR016W | biological_process unknown |
| YPR148C | YPR148C | biological_process unknown |

Known: 34, Unknown: 4, Not in annotation: 3

### Group G

|         |         |                                                     |
|---------|---------|-----------------------------------------------------|
| YNL097C | PHO23   | DNA metabolism, nuclear organization and biogenesis |
| YCR052W | RSC6    | DNA metabolism, nuclear organization and biogenesis |
| YFR037C | RSC8    | DNA metabolism, nuclear organization and biogenesis |
| YGL044C | RNA15   | RNA metabolism                                      |
| YLR298C | YHC1    | RNA metabolism                                      |
| YIL063C | YRB2    | nuclear organization and biogenesis                 |
| YGL095C | VPS45   | organelle organization and biogenesis               |
| YMR005W | TAF4    | transcription                                       |
| YLR025W | SNF7    | vesicle-mediated transport                          |
| YPR173C | VPS4    | vesicle-mediated transport                          |
| YBR227C | MCX1    | biological_process unknown                          |
| YPL105C | YPL105C | biological_process unknown                          |
| YPR125W | YPR125W | biological_process unknown                          |
| YGL164C | YRB30   | biological_process unknown                          |

Known: 10, Unknown: 4, Not in annotation: 0

### Group H

|         |      |                                       |
|---------|------|---------------------------------------|
| YLR377C | FBP1 | carbohydrate metabolism               |
| YER065C | ICL1 | carbohydrate metabolism               |
| YNL117W | MLS1 | carbohydrate metabolism               |
| YKR097W | PCK1 | carbohydrate metabolism               |
| YGR070W | ROM1 | cell wall organization and biogenesis |
| YKL217W | JEN1 | transport                             |
| YJR095W | SFC1 | transport                             |

Known: 7, Unknown: 0, Not in annotation: 0

### Group I

|         |       |                                                     |
|---------|-------|-----------------------------------------------------|
| YKL085W | MDH1  | carbohydrate metabolism                             |
| YLL041C | SDH2  | carbohydrate metabolism                             |
| YDR178W | SDH4  | carbohydrate metabolism                             |
| YGL191W | COX13 | cellular respiration                                |
| YGL187C | COX4  | cellular respiration                                |
| YHR051W | COX6  | cellular respiration                                |
| YLR395C | COX8  | cellular respiration                                |
| YEL024W | RIP1  | cellular respiration                                |
| YKL016C | ATP7  | coenzyme and prosthetic group metabolism, transport |
| YJR048W | CYC1  | electron transport                                  |
| YEL039C | CYC7  | electron transport                                  |
| YOR065W | CYT1  | electron transport                                  |
| YML120C | NDI1  | electron transport                                  |

Known: 13, Unknown: 0, Not in annotation: 0

#### Group J

|         |      |                         |
|---------|------|-------------------------|
| YLR304C | ACO1 | carbohydrate metabolism |
| YNL037C | IDH1 | carbohydrate metabolism |
| YOR136W | IDH2 | carbohydrate metabolism |
| YDL066W | IDP1 | carbohydrate metabolism |
| YKL148C | SDH1 | carbohydrate metabolism |
| YCR011C | ADP1 | transport               |
| YIL088C | AVT7 | transport               |
| YPL265W | DIP5 | transport               |

Known: 8, Unknown: 0, Not in annotation: 0

#### Group K

|         |         |                                                              |
|---------|---------|--------------------------------------------------------------|
| YML128C | MSC1    | DNA metabolism                                               |
| YLR270W | DCS1    | RNA metabolism                                               |
| YMR170C | ALD2    | amino acid and derivative metabolism                         |
| YDR129C | SAC6    | budding, response to stress, vesicle-mediated transport      |
| YBR149W | ARA1    | carbohydrate metabolism                                      |
| YCL040W | GLK1    | carbohydrate metabolism                                      |
| YMR105C | PGM2    | carbohydrate metabolism                                      |
| YJR096W | YJR096W | carbohydrate metabolism                                      |
| YDR368W | YPR1    | carbohydrate metabolism                                      |
| YEL011W | GLC3    | carbohydrate metabolism, energy pathways                     |
| YMR311C | GLC8    | carbohydrate metabolism, energy pathways                     |
| YFR015C | GSY1    | carbohydrate metabolism, energy pathways                     |
| YLR258W | GSY2    | carbohydrate metabolism, energy pathways                     |
| YEL012W | UBC8    | carbohydrate metabolism, protein modification                |
| YBR126C | TPS1    | carbohydrate metabolism, response to stress                  |
| YDR074W | TPS2    | carbohydrate metabolism, response to stress                  |
| YKL193C | SDS22   | cell cycle                                                   |
| YML004C | GLO1    | coenzyme and prosthetic group metabolism                     |
| YDR171W | HSP42   | cytoskeleton organization and biogenesis, response to stress |



|         |           |                                                                       |
|---------|-----------|-----------------------------------------------------------------------|
| YML054C | CYB2      | electron transport                                                    |
| YIL124W | AYR1      | lipid metabolism                                                      |
| YOR036W | PEP12     | organelle organization and biogenesis, transport, vesicle-mediated tr |
| YGR076C | MRPL25    | protein biosynthesis                                                  |
| YER050C | RSM18     | protein biosynthesis                                                  |
| YNL007C | SIS1      | protein biosynthesis                                                  |
| YKL103C | LAP4      | protein catabolism                                                    |
| YLR178C | TFS1      | protein catabolism                                                    |
| YJL164C | TPK1      | pseudohyphal growth                                                   |
| YDR214W | AHA1      | response to stress                                                    |
| YMR250W | GAD1      | response to stress                                                    |
| YDL022W | GPD1      | response to stress                                                    |
| YCL035C | GRX1      | response to stress                                                    |
| YMR186W | HSC82     | response to stress                                                    |
| YLL026W | HSP104    | response to stress                                                    |
| YPL240C | HSP82     | response to stress                                                    |
| YJL034W | KAR2      | response to stress                                                    |
| YER103W | SSA4      | response to stress                                                    |
| YGR008C | STF2      | response to stress                                                    |
| YML100W | TSL1      | response to stress                                                    |
| YDR513W | TTR1      | response to stress                                                    |
| YCL033C | YCL033C   | response to stress                                                    |
| YCL067C | HMLALPHA2 | transcription                                                         |
| YCR039C | MATALPHA2 | transcription                                                         |
| YGR028W | MSP1      | transport                                                             |
| YAL005C | SSA1      | transport                                                             |
| YLL024C | SSA2      | transport                                                             |
| YGR174C | CBP4      | Not in annotation                                                     |
| YLR216C | CPR6      | Not in annotation                                                     |
| YOR027W | STI1      | Not in annotation                                                     |
| YCR096C | HMRA2     | biological_process unknown                                            |
| YGR248W | SOL4      | biological_process unknown                                            |
| YER175C | TMT1      | biological_process unknown                                            |
| YBR056W | YBR056W   | biological_process unknown                                            |
| YBR280C | YBR280C   | biological_process unknown                                            |
| YCL042W | YCL042W   | biological_process unknown                                            |
| YDL091C | YDL091C   | biological_process unknown                                            |
| YDL124W | YDL124W   | biological_process unknown                                            |
| YER053C | YER053C   | biological_process unknown                                            |
| YHL021C | YHL021C   | biological_process unknown                                            |
| YKL091C | YKL091C   | biological_process unknown                                            |
| YKL151C | YKL151C   | biological_process unknown                                            |
| YLR149C | YLR149C   | biological_process unknown                                            |
| YLR247C | YLR247C   | biological_process unknown                                            |
| YLR251W | YLR251W   | biological_process unknown                                            |
| YLR327C | YLR327C   | biological_process unknown                                            |
| YMR027W | YMR027W   | biological_process unknown                                            |
| YMR110C | YMR110C   | biological_process unknown                                            |
| YNL134C | YNL134C   | biological_process unknown                                            |
| YOL032W | YOL032W   | biological_process unknown                                            |
| YOR215C | YOR215C   | biological_process unknown                                            |

YPR158W      YPR158W      biological\_process unknown

Known: 46, Unknown: 22, Not in annotation: 3

#### Group L

|         |         |                                          |
|---------|---------|------------------------------------------|
| YGR256W | GND2    | carbohydrate metabolism                  |
| YKR076W | ECM4    | cell wall organization and biogenesis    |
| YIR038C | GTT1    | coenzyme and prosthetic group metabolism |
| YGR088W | CTT1    | response to stress                       |
| YIR037W | HYR1    | response to stress                       |
| YMR322C | SNO4    | vitamin metabolism                       |
| YOR031W | CRS5    | Not in annotation                        |
| YDR533C | YDR533C | biological_process unknown               |
| YGR043C | YGR043C | biological_process unknown               |
| YOR391C | YOR391C | biological_process unknown               |

Known: 6, Unknown: 3, Not in annotation: 1

#### Group M

|         |         |                                          |
|---------|---------|------------------------------------------|
| YGR193C | PDX1    | coenzyme and prosthetic group metabolism |
| YCR003W | MRPL32  | protein biosynthesis                     |
| YGR220C | MRPL9   | protein biosynthesis                     |
| YOR158W | PET123  | protein biosynthesis                     |
| YDR175C | RSM24   | protein biosynthesis                     |
| YNL315C | ATP11   | Not in annotation                        |
| YDR494W | YDR494W | biological_process unknown               |

Known: 5, Unknown: 1, Not in annotation: 1

#### Group N

|         |         |                             |
|---------|---------|-----------------------------|
| YDR263C | DIN7    | DNA metabolism              |
| YOR033C | EXO1    | DNA metabolism              |
| YML062C | MFT1    | DNA metabolism              |
| YLR265C | NEJ1    | DNA metabolism              |
| YML065W | ORC1    | DNA metabolism              |
| YLL004W | ORC3    | DNA metabolism              |
| YFR023W | PES4    | DNA metabolism              |
| YIL139C | REV7    | DNA metabolism              |
| YPR120C | CLB5    | DNA metabolism, cell cycle  |
| YGR109C | CLB6    | DNA metabolism, cell cycle  |
| YPL033C | YPL033C | DNA metabolism, meiosis     |
| YPR078C | YPR078C | DNA metabolism, meiosis     |
| YPL178W | CBC2    | RNA metabolism              |
| YNR034W | SOL1    | RNA metabolism              |
| YIL159W | BNR1    | budding, response to stress |
| YJL155C | FBP26   | carbohydrate metabolism     |

|         |         |                                                         |
|---------|---------|---------------------------------------------------------|
| YFL017C | GNA1    | carbohydrate metabolism                                 |
| YDL049C | KNH1    | carbohydrate metabolism                                 |
| YEL061C | CIN8    | cell cycle                                              |
| YER106W | MAM1    | cell cycle                                              |
| YDL028C | MPS1    | cell cycle                                              |
| YLR045C | STU2    | cell cycle, cytoskeleton organization and biogenesis    |
| YOR073W | SGO1    | cell cycle, meiosis                                     |
| YDR260C | SWM1    | cell cycle, sporulation                                 |
| YLR220W | CCC1    | cell homeostasis                                        |
| YDR218C | SPR28   | cell wall organization and biogenesis                   |
| YGR059W | SPR3    | cell wall organization and biogenesis                   |
| YCR002C | CDC10   | cell wall organization and biogenesis, cytokinesis      |
| YLR314C | CDC3    | cell wall organization and biogenesis, cytokinesis      |
| YOR212W | STE4    | conjugation, signal transduction                        |
| YDR103W | STE5    | conjugation, signal transduction                        |
| YKL189W | HYM1    | cytokinesis, morphogenesis                              |
| YNL225C | CNM67   | cytoskeleton organization and biogenesis                |
| YPL253C | VIK1    | cytoskeleton organization and biogenesis                |
| YKL004W | AUR1    | lipid metabolism                                        |
| YGR202C | PCT1    | lipid metabolism                                        |
| YDR273W | DON1    | meiosis                                                 |
| YPL130W | SPO19   | meiosis                                                 |
| YOL091W | SPO21   | meiosis                                                 |
| YBL009W | YBL009W | meiosis                                                 |
| YIL112W | HOS4    | meiosis, protein modification                           |
| YOR165W | SEY1    | membrane organization and biogenesis                    |
| YPR140W | YPR140W | membrane organization and biogenesis                    |
| YGR099W | TEL2    | nuclear organization and biogenesis, response to stress |
| YLR368W | MDM30   | organelle organization and biogenesis                   |
| YHR150W | PEX28   | organelle organization and biogenesis                   |
| YKL167C | MRP49   | protein biosynthesis                                    |
| YKL142W | MRP8    | protein biosynthesis                                    |
| YBR268W | MRPL37  | protein biosynthesis                                    |
| YMR188C | MRPS17  | protein biosynthesis                                    |
| YDR041W | RSM10   | protein biosynthesis                                    |
| YGR185C | TYS1    | protein biosynthesis                                    |
| YLR127C | APC2    | protein catabolism                                      |
| YDR118W | APC4    | protein catabolism                                      |
| YOR249C | APC5    | protein catabolism                                      |
| YHR166C | CDC23   | protein catabolism                                      |
| YFR036W | CDC26   | protein catabolism                                      |
| YBL084C | CDC27   | protein catabolism                                      |
| YLR195C | NMT1    | protein modification                                    |
| YDR523C | SPS1    | protein modification                                    |
| YOR339C | UBC11   | protein modification                                    |
| YER123W | YCK3    | protein modification                                    |
| YJR099W | YUH1    | protein modification                                    |
| YLR227C | ADY4    | sporulation                                             |
| YLR307W | CDA1    | sporulation                                             |
| YLR308W | CDA2    | sporulation                                             |
| YDR403W | DIT1    | sporulation                                             |
| YDR402C | DIT2    | sporulation                                             |

|         |         |                            |
|---------|---------|----------------------------|
| YER180C | ISC10   | sporulation                |
| YIL099W | SGA1    | sporulation                |
| YPL027W | SMA1    | sporulation                |
| YML066C | SMA2    | sporulation                |
| YDR104C | SPO71   | sporulation                |
| YGL170C | SPO74   | sporulation                |
| YLL005C | SPO75   | sporulation                |
| YLR341W | SPO77   | sporulation                |
| YOR190W | SPR1    | sporulation                |
| YER115C | SPR6    | sporulation                |
| YDR522C | SPS2    | sporulation                |
| YHR184W | SSP1    | sporulation                |
| YOR242C | SSP2    | sporulation                |
| YNL128W | TEP1    | sporulation                |
| YIR013C | GAT4    | transcription              |
| YOL068C | HST1    | transcription              |
| YNR007C | ATG3    | transport                  |
| YBL078C | ATG8    | transport                  |
| YIR004W | DJP1    | transport                  |
| YDR508C | GNP1    | transport                  |
| YNL318C | HXT14   | transport                  |
| YHR015W | MIP6    | transport                  |
| YDR113C | PDS1    | transport                  |
| YGL162W | SUT1    | transport                  |
| YML097C | VPS9    | transport                  |
| YLR093C | NYV1    | vesicle-mediated transport |
| YMR017W | SPO20   | vesicle-mediated transport |
| YDR177W | UBC1    | vesicle-mediated transport |
| YOR089C | VPS21   | vesicle-mediated transport |
| YDL080C | THI3    | vitamin metabolism         |
| YLR209C | PNP1    | Not in annotation          |
| YLR213C | CRR1    | biological_process unknown |
| YDR371W | CTS2    | biological_process unknown |
| YDR516C | EMI2    | biological_process unknown |
| YGR196C | FYV8    | biological_process unknown |
| YOL132W | GAS4    | biological_process unknown |
| YAL018C | YAL018C | biological_process unknown |
| YBR070C | YBR070C | biological_process unknown |
| YBR250W | YBR250W | biological_process unknown |
| YCL048W | YCL048W | biological_process unknown |
| YDL114W | YDL114W | biological_process unknown |
| YDR042C | YDR042C | biological_process unknown |
| YDR065W | YDR065W | biological_process unknown |
| YDR317W | YDR317W | biological_process unknown |
| YDR438W | YDR438W | biological_process unknown |
| YEL023C | YEL023C | biological_process unknown |
| YEL057C | YEL057C | biological_process unknown |
| YER085C | YER085C | biological_process unknown |
| YER182W | YER182W | biological_process unknown |
| YFL040W | YFL040W | biological_process unknown |
| YFR032C | YFR032C | biological_process unknown |

|         |         |                            |
|---------|---------|----------------------------|
| YGL015C | YGL015C | biological_process unknown |
| YGL138C | YGL138C | biological_process unknown |
| YGR226C | YGR226C | biological_process unknown |
| YGR266W | YGR266W | biological_process unknown |
| YGR273C | YGR273C | biological_process unknown |
| YHL012W | YHL012W | biological_process unknown |
| YIL077C | YIL077C | biological_process unknown |
| YIL161W | YIL161W | biological_process unknown |
| YJL037W | YJL037W | biological_process unknown |
| YJL038C | YJL038C | biological_process unknown |
| YJL160C | YJL160C | biological_process unknown |
| YKR005C | YKR005C | biological_process unknown |
| YKR089C | YKR089C | biological_process unknown |
| YKR100C | YKR100C | biological_process unknown |
| YLL012W | YLL012W | biological_process unknown |
| YLL022C | YLL022C | biological_process unknown |
| YLR012C | YLR012C | biological_process unknown |
| YLR030W | YLR030W | biological_process unknown |
| YLR343W | YLR343W | biological_process unknown |
| YMR114C | YMR114C | biological_process unknown |
| YMR144W | YMR144W | biological_process unknown |
| YNL019C | YNL019C | biological_process unknown |
| YNL033W | YNL033W | biological_process unknown |
| YNL034W | YNL034W | biological_process unknown |
| YOL015W | YOL015W | biological_process unknown |
| YOL024W | YOL024W | biological_process unknown |
| YOL047C | YOL047C | biological_process unknown |
| YOL048C | YOL048C | biological_process unknown |
| YPR027C | YPR027C | biological_process unknown |
| YBR148W | YSW1    | biological_process unknown |

Known: 98, Unknown: 50, Not in annotation: 1

### Group O

|         |         |                            |
|---------|---------|----------------------------|
| YHR157W | REC104  | DNA metabolism             |
| YHL022C | SPO11   | DNA metabolism             |
| YHR014W | SPO13   | cell cycle                 |
| YOL104C | NDJ1    | meiosis                    |
| YPR007C | REC8    | meiosis                    |
| YBR184W | YBR184W | biological_process unknown |
| YGL081W | YGL081W | biological_process unknown |

Known: 5, Unknown: 2, Not in annotation: 0

### Group P

|         |       |                |
|---------|-------|----------------|
| YOR074C | CDC21 | DNA metabolism |
| YLR103C | CDC45 | DNA metabolism |
| YPR175W | DPB2  | DNA metabolism |
| YOL090W | MSH2  | DNA metabolism |
| YDR097C | MSH6  | DNA metabolism |

|         |         |                                                                    |
|---------|---------|--------------------------------------------------------------------|
| YBL035C | POL12   | DNA metabolism                                                     |
| YNL262W | POL2    | DNA metabolism                                                     |
| YBR088C | POL30   | DNA metabolism                                                     |
| YJR043C | POL32   | DNA metabolism                                                     |
| YKL045W | PRI2    | DNA metabolism                                                     |
| YPL153C | RAD53   | DNA metabolism                                                     |
| YAR007C | RFA1    | DNA metabolism                                                     |
| YJL173C | RFA3    | DNA metabolism                                                     |
| YBR087W | RFC5    | DNA metabolism                                                     |
| YLR383W | RHC18   | DNA metabolism                                                     |
| YIL066C | RNR3    | DNA metabolism                                                     |
| YLL002W | RTT109  | DNA metabolism                                                     |
| YLR154C | YLR154C | DNA metabolism                                                     |
| YER095W | RAD51   | DNA metabolism, nuclear organization and biogenesis, response to s |
| YAR008W | SEN34   | RNA metabolism                                                     |
| YIL140W | AXL2    | budding                                                            |
| YGR152C | RSR1    | budding                                                            |
| YCL024W | KCC4    | budding, cytokinesis, protein modification                         |
| YPL256C | CLN2    | cell cycle                                                         |
| YDL003W | MCD1    | cell cycle                                                         |
| YMR076C | PDS5    | cell cycle                                                         |
| YFL008W | SMC1    | cell cycle                                                         |
| YNL309W | STB1    | cell cycle                                                         |
| YML027W | YOX1    | cell cycle                                                         |
| YCR065W | HCM1    | cell cycle, transcription                                          |
| YGL027C | CWH41   | cell wall organization and biogenesis                              |
| YIL026C | IRR1    | conjugation                                                        |
| YNL233W | BNI4    | cytokinesis                                                        |
| YJL187C | SWE1    | meiosis                                                            |
| YDL101C | DUN1    | protein modification                                               |
| YLR313C | SPH1    | pseudohyphal growth                                                |
| YJL074C | SMC3    | sporulation                                                        |
| YOL017W | ESC8    | transcription                                                      |
| YMR179W | SPT21   | transcription                                                      |
| YPL163C | SVS1    | Not in annotation                                                  |
| YGR189C | CRH1    | biological_process unknown                                         |
| YKR013W | PRY2    | biological_process unknown                                         |
| YLR183C | TOS4    | biological_process unknown                                         |
| YGR221C | YGR221C | biological_process unknown                                         |
| YHR149C | YHR149C | biological_process unknown                                         |
| YJL181W | YJL181W | biological_process unknown                                         |
| YKR077W | YKR077W | biological_process unknown                                         |
| YNL300W | YNL300W | biological_process unknown                                         |
| YOL007C | YOL007C | biological_process unknown                                         |
| YOL019W | YOL019W | biological_process unknown                                         |
| YPL267W | YPL267W | biological_process unknown                                         |
| YPR174C | YPR174C | biological_process unknown                                         |

Known: 39, Unknown: 12, Not in annotation: 1

**Group Q**

|         |         |                                                                    |
|---------|---------|--------------------------------------------------------------------|
| YER190W | YRF1-2  | DNA metabolism, nuclear organization and biogenesis, response to s |
| YGR296W | YRF1-3  | DNA metabolism, nuclear organization and biogenesis, response to s |
| YLR466W | YRF1-4  | DNA metabolism, nuclear organization and biogenesis, response to s |
| YLR467W | YRF1-5  | DNA metabolism, nuclear organization and biogenesis, response to s |
| YNL339C | YRF1-6  | DNA metabolism, nuclear organization and biogenesis, response to s |
| YBL111C | YBL111C | biological_process unknown                                         |
| YBL113C | YBL113C | biological_process unknown                                         |
| YEL075C | YEL075C | biological_process unknown                                         |
| YEL076C | YEL076C | biological_process unknown                                         |
| YEL077C | YEL077C | biological_process unknown                                         |
| YER189W | YER189W | biological_process unknown                                         |
| YFL064C | YFL064C | biological_process unknown                                         |
| YFL067W | YFL067W | biological_process unknown                                         |
| YHL049C | YHL049C | biological_process unknown                                         |
| YHL050C | YHL050C | biological_process unknown                                         |
| YHR218W | YHR218W | biological_process unknown                                         |
| YHR219W | YHR219W | biological_process unknown                                         |
| YIL177C | YIL177C | biological_process unknown                                         |
| YJL225C | YJL225C | biological_process unknown                                         |
| YLL066C | YLL066C | biological_process unknown                                         |
| YLL067C | YLL067C | biological_process unknown                                         |
| YLR462W | YLR462W | biological_process unknown                                         |
| YLR464W | YLR464W | biological_process unknown                                         |
| YPR202W | YPR202W | biological_process unknown                                         |
| YPR203W | YPR203W | biological_process unknown                                         |
| YPR204W | YPR204W | biological_process unknown                                         |

Known: 5, Unknown: 21, Not in annotation: 0

**Group R**

|         |      |                                                     |
|---------|------|-----------------------------------------------------|
| YNL030W | HHF2 | DNA metabolism, nuclear organization and biogenesis |
| YBR010W | HHT1 | DNA metabolism, nuclear organization and biogenesis |
| YNL031C | HHT2 | DNA metabolism, nuclear organization and biogenesis |
| YDR225W | HTA1 | DNA metabolism, nuclear organization and biogenesis |
| YBL003C | HTA2 | DNA metabolism, nuclear organization and biogenesis |
| YDR224C | HTB1 | DNA metabolism, nuclear organization and biogenesis |
| YBL002W | HTB2 | DNA metabolism, nuclear organization and biogenesis |

Known: 7, Unknown: 0, Not in annotation: 0

**Group S**

|         |       |                                          |
|---------|-------|------------------------------------------|
| YIL129C | TAO3  | budding                                  |
| YJL158C | CIS3  | cell wall organization and biogenesis    |
| YBR078W | ECM33 | cell wall organization and biogenesis    |
| YIL123W | SIM1  | cytoskeleton organization and biogenesis |
| YJL134W | LCB3  | lipid metabolism, signal transduction    |
| YBR243C | ALG7  | protein modification                     |

|         |         |                                       |
|---------|---------|---------------------------------------|
| YPL116W | HOS3    | protein modification                  |
| YAL023C | PMT2    | protein modification                  |
| YDL145C | COP1    | transport, vesicle-mediated transport |
| YOR247W | SRL1    | Not in annotation                     |
| YMR215W | GAS3    | biological_process unknown            |
| YGL101W | YGL101W | biological_process unknown            |
| YLR455W | YLR455W | biological_process unknown            |
| YMR003W | YMR003W | biological_process unknown            |

Known: 9, Unknown: 4, Not in annotation: 1

### Group T

|         |         |                            |
|---------|---------|----------------------------|
| YLR131C | ACE2    | cell cycle                 |
| YGL021W | ALK1    | cell cycle                 |
| YPR119W | CLB2    | cell cycle                 |
| YAR018C | KIN3    | cell cycle                 |
| YPL155C | KIP2    | cell cycle                 |
| YML034W | SRC1    | cell cycle                 |
| YDR146C | SWI5    | cell cycle                 |
| YGR108W | CLB1    | cell cycle, meiosis        |
| YBR038W | CHS2    | cytokinesis                |
| YMR032W | HOF1    | cytokinesis                |
| YHR023W | MYO1    | cytokinesis                |
| YLR084C | RAX2    | cytokinesis                |
| YOR025W | HST3    | lipid metabolism           |
| YGL116W | CDC20   | protein catabolism         |
| YMR001C | CDC5    | protein modification       |
| YIL106W | MOB1    | protein modification       |
| YLR190W | MMR1    | biological_process unknown |
| YDR033W | MRH1    | biological_process unknown |
| YIL158W | YIL158W | biological_process unknown |
| YML119W | YML119W | biological_process unknown |
| YNL058C | YNL058C | biological_process unknown |
| YOL070C | YOL070C | biological_process unknown |
| YPL141C | YPL141C | biological_process unknown |
| YBR054W | YRO2    | biological_process unknown |

Known: 16, Unknown: 8, Not in annotation: 0

### Group U

|         |        |                                       |
|---------|--------|---------------------------------------|
| YBR158W | AMN1   | cell cycle                            |
| YNL078W | NIS1   | cell cycle                            |
| YLR079W | SIC1   | cell cycle                            |
| YER124C | DSE1   | cell wall organization and biogenesis |
| YHR143W | DSE2   | cell wall organization and biogenesis |
| YJL159W | HSP150 | cell wall organization and biogenesis |
| YKL164C | PIR1   | cell wall organization and biogenesis |
| YKL163W | PIR3   | cell wall organization and biogenesis |



|         |         |                            |
|---------|---------|----------------------------|
| YGR041W | BUD9    | cytokinesis                |
| YLR286C | CTS1    | cytokinesis                |
| YNR067C | DSE4    | cytokinesis                |
| YNL327W | EGT2    | cytokinesis                |
| YGL028C | SCW11   | cytokinesis                |
| YIL009W | FAA3    | lipid metabolism           |
| YKL185W | ASH1    | pseudohyphal growth        |
| YBR083W | TEC1    | pseudohyphal growth        |
| YKL116C | PRR1    | signal transduction        |
| YGR086C | PIL1    | biological_process unknown |
| YJL078C | PRY3    | biological_process unknown |
| YDR055W | PST1    | biological_process unknown |
| YPL158C | YPL158C | biological_process unknown |

Known: 17, Unknown: 4, Not in annotation: 0

#### Group V

|         |         |                                                     |
|---------|---------|-----------------------------------------------------|
| YDR073W | SNF11   | DNA metabolism, nuclear organization and biogenesis |
| YPR134W | MSS18   | RNA metabolism                                      |
| YDR034C | LYS14   | amino acid and derivative metabolism                |
| YPR131C | NAT3    | protein modification                                |
| YJR153W | PGU1    | pseudohyphal growth                                 |
| YER045C | ACA1    | transcription                                       |
| YBR279W | PAF1    | transcription                                       |
| YPR067W | ISA2    | transport                                           |
| YIL167W | YIL167W | Not in annotation                                   |
| YDR266C | YDR266C | biological_process unknown                          |
| YIL165C | YIL165C | biological_process unknown                          |
| YJR080C | YJR080C | biological_process unknown                          |

Known: 8, Unknown: 3, Not in annotation: 1

#### Group W

|         |         |                                  |
|---------|---------|----------------------------------|
| YJR086W | STE18   | conjugation, signal transduction |
| YJL223C | PAU1    | biological_process unknown       |
| YEL049W | PAU2    | biological_process unknown       |
| YLR461W | PAU4    | biological_process unknown       |
| YFL020C | PAU5    | biological_process unknown       |
| YNR076W | PAU6    | biological_process unknown       |
| YGR294W | YGR294W | biological_process unknown       |
| YHL046C | YHL046C | biological_process unknown       |
| YIR041W | YIR041W | biological_process unknown       |
| YLL064C | YLL064C | biological_process unknown       |

Known: 1, Unknown: 9, Not in annotation: 0

**Group X**

|         |       |                                                                     |
|---------|-------|---------------------------------------------------------------------|
| YKL001C | MET14 | amino acid and derivative metabolism                                |
| YNL277W | MET2  | amino acid and derivative metabolism                                |
| YLL062C | MHT1  | amino acid and derivative metabolism                                |
| YGL184C | STR3  | amino acid and derivative metabolism                                |
| YKR069W | MET1  | amino acid and derivative metabolism, coenzyme and prosthetic group |
| YIR017C | MET28 | amino acid and derivative metabolism, transcription                 |
| YLL061W | MMP1  | transport                                                           |
| YGR055W | MUP1  | transport                                                           |
| YPL274W | SAM3  | transport                                                           |

Known: 9, Unknown: 0, Not in annotation: 0

**Group Y**

|         |         |                                         |
|---------|---------|-----------------------------------------|
| YGR089W | NNF2    | cell cycle                              |
| YOR129C | YOR129C | cell homeostasis                        |
| YNL197C | WHI3    | morphogenesis                           |
| YER114C | BOI2    | signal transduction                     |
| YKR031C | SPO14   | sporulation, vesicle-mediated transport |
| YJR031C | GEA1    | transport, vesicle-mediated transport   |
| YGL139W | YGL139W | biological_process unknown              |

Known: 6, Unknown: 1, Not in annotation: 0

**Group Z**

|         |            |                                     |
|---------|------------|-------------------------------------|
| YGL090W | LIF1       | DNA metabolism                      |
| YNR044W | AGA1       | conjugation                         |
| YGL032C | AGA2       | conjugation                         |
| YJL170C | ASG7       | conjugation                         |
| YCL027W | FUS1       | conjugation                         |
| YGL089C | MF(ALPHA)2 | conjugation                         |
| YIL037C | PRM2       | conjugation                         |
| YJR004C | SAG1       | conjugation                         |
| YFL026W | STE2       | conjugation                         |
| YNL145W | MFA2       | conjugation, signal transduction    |
| YKL178C | STE3       | conjugation, signal transduction    |
| YCL055W | KAR4       | meiosis                             |
| YPL192C | PRM3       | nuclear organization and biogenesis |
| YBL016W | FUS3       | protein modification                |
| YLR120C | YPS1       | protein modification                |
| YLR452C | SST2       | signal transduction                 |
| YIL079C | AIR1       | transport                           |
| YNL279W | PRM1       | Not in annotation                   |
| YPL088W | YPL088W    | Not in annotation                   |

Known: 17, Unknown: 0, Not in annotation: 2

**Group AA**

|         |         |                                                              |
|---------|---------|--------------------------------------------------------------|
| YNR058W | BIO3    | coenzyme and prosthetic group metabolism, vitamin metabolism |
| YNR056C | BIO5    | transport                                                    |
| YPL249C | GYP5    | vesicle-mediated transport                                   |
| YMR077C | VPS20   | vesicle-mediated transport                                   |
| YLR408C | YLR408C | biological_process unknown                                   |
| YMR073C | YMR073C | biological_process unknown                                   |
| YMR075W | YMR075W | biological_process unknown                                   |
| YOL164W | YOL164W | biological_process unknown                                   |

Known: 4, Unknown: 4, Not in annotation: 0

**Group BB**

|         |        |                                       |
|---------|--------|---------------------------------------|
| YKL038W | RGT1   | carbohydrate metabolism               |
| YJL047C | RTT101 | cell cycle                            |
| YDR293C | SSD1   | cell wall organization and biogenesis |
| YKL020C | SPT23  | lipid metabolism, response to stress  |
| YDR379W | RGA2   | pseudohyphal growth                   |
| YDR335W | MSN5   | transport                             |
| YKL179C | COY1   | vesicle-mediated transport            |

Known: 7, Unknown: 0, Not in annotation: 0

**Group CC**

|           |         |                            |
|-----------|---------|----------------------------|
| YJR010C-A | SPC1    | protein modification       |
| YHL048W   | COS8    | response to stress         |
| YIR043C   | YIR043C | Not in annotation          |
| YIR044C   | YIR044C | Not in annotation          |
| YBR302C   | COS2    | biological_process unknown |
| YML132W   | COS3    | biological_process unknown |
| YFL062W   | COS4    | biological_process unknown |
| YJR161C   | COS5    | biological_process unknown |
| YDL248W   | COS7    | biological_process unknown |

Known: 2, Unknown: 5, Not in annotation: 2

**Group DD**

|         |       |                                       |
|---------|-------|---------------------------------------|
| YBL019W | APN2  | DNA metabolism                        |
| YDR076W | RAD55 | DNA metabolism                        |
| YBR019C | GAL10 | carbohydrate metabolism               |
| YBR076W | ECM8  | cell wall organization and biogenesis |
| YGL178W | MPT5  | cell wall organization and biogenesis |

|         |         |                                          |
|---------|---------|------------------------------------------|
| YAR019C | CDC15   | cytokinesis                              |
| YJR108W | ABM1    | cytoskeleton organization and biogenesis |
| YCR068W | ATG15   | membrane organization and biogenesis     |
| YAL010C | MDM10   | organelle organization and biogenesis    |
| YNR002C | FUN34   | transport                                |
| YDL244W | THI13   | vitamin metabolism                       |
| YPL276W | FDH2    | Not in annotation                        |
| YAL031C | FUN21   | biological_process unknown               |
| YMR156C | TPP1    | biological_process unknown               |
| YAR023C | YAR023C | biological_process unknown               |
| YER066W | YER066W | biological_process unknown               |
| YER185W | YER185W | biological_process unknown               |
| YER187W | YER187W | biological_process unknown               |

Known: 11, Unknown: 6, Not in annotation: 1

#### Group EE

|         |         |                                    |
|---------|---------|------------------------------------|
| YIL153W | RRD1    | DNA metabolism, response to stress |
| YHR044C | DOG1    | carbohydrate metabolism            |
| YGR292W | MAL12   | carbohydrate metabolism            |
| YNL289W | PCL1    | cell cycle                         |
| YKL086W | YKL086W | response to stress                 |
| YFL050C | ALR2    | transport                          |
| YNL333W | SNZ2    | vitamin metabolism                 |
| YFL059W | SNZ3    | vitamin metabolism                 |
| YGR087C | PDC6    | Not in annotation                  |
| YNR069C | BSC5    | biological_process unknown         |
| YFL052W | YFL052W | biological_process unknown         |

Known: 8, Unknown: 2, Not in annotation: 1

#### Group FF

|           |           |                                              |
|-----------|-----------|----------------------------------------------|
| YAR010C   | YAR010C   | Not in annotation (Ty element transposition) |
| YBL005W-A | YBL005W-A | Not in annotation (Ty element transposition) |
| YJR026W   | YJR026W   | Not in annotation (Ty element transposition) |
| YJR028W   | YJR028W   | Not in annotation (Ty element transposition) |
| YML040W   | YML040W   | Not in annotation (Ty element transposition) |
| YMR046C   | YMR046C   | Not in annotation (Ty element transposition) |
| YMR051C   | YMR051C   | Not in annotation (Ty element transposition) |

Known: 0, Unknown: 0, Not in annotation: 7
